# Supplementary material
Source: MDPI journal article supplement (https://www.mdpi.com/2072-4292/9/10/1068)
Supplement: s1 [file s1]

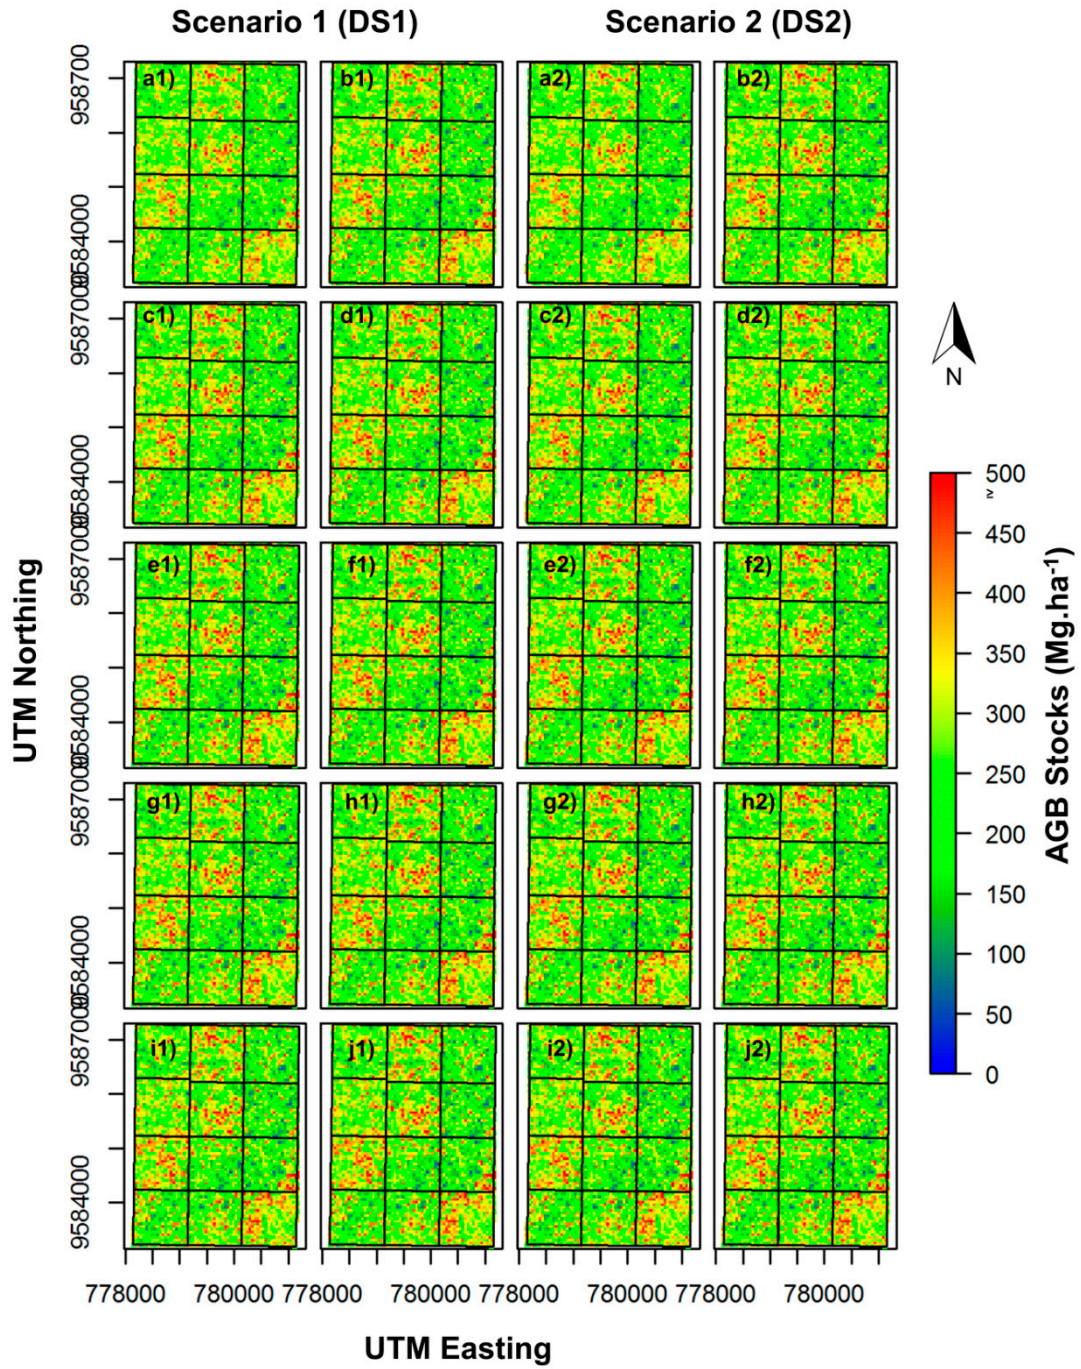

**Figure S1.** Mean of the 30 replicates AGB stocks in 2012 at pulse density ranging from 0.2 to 12 pulse·m<sup>-2</sup> in DS1 (a1–j1) and DS2 (a2–j2).

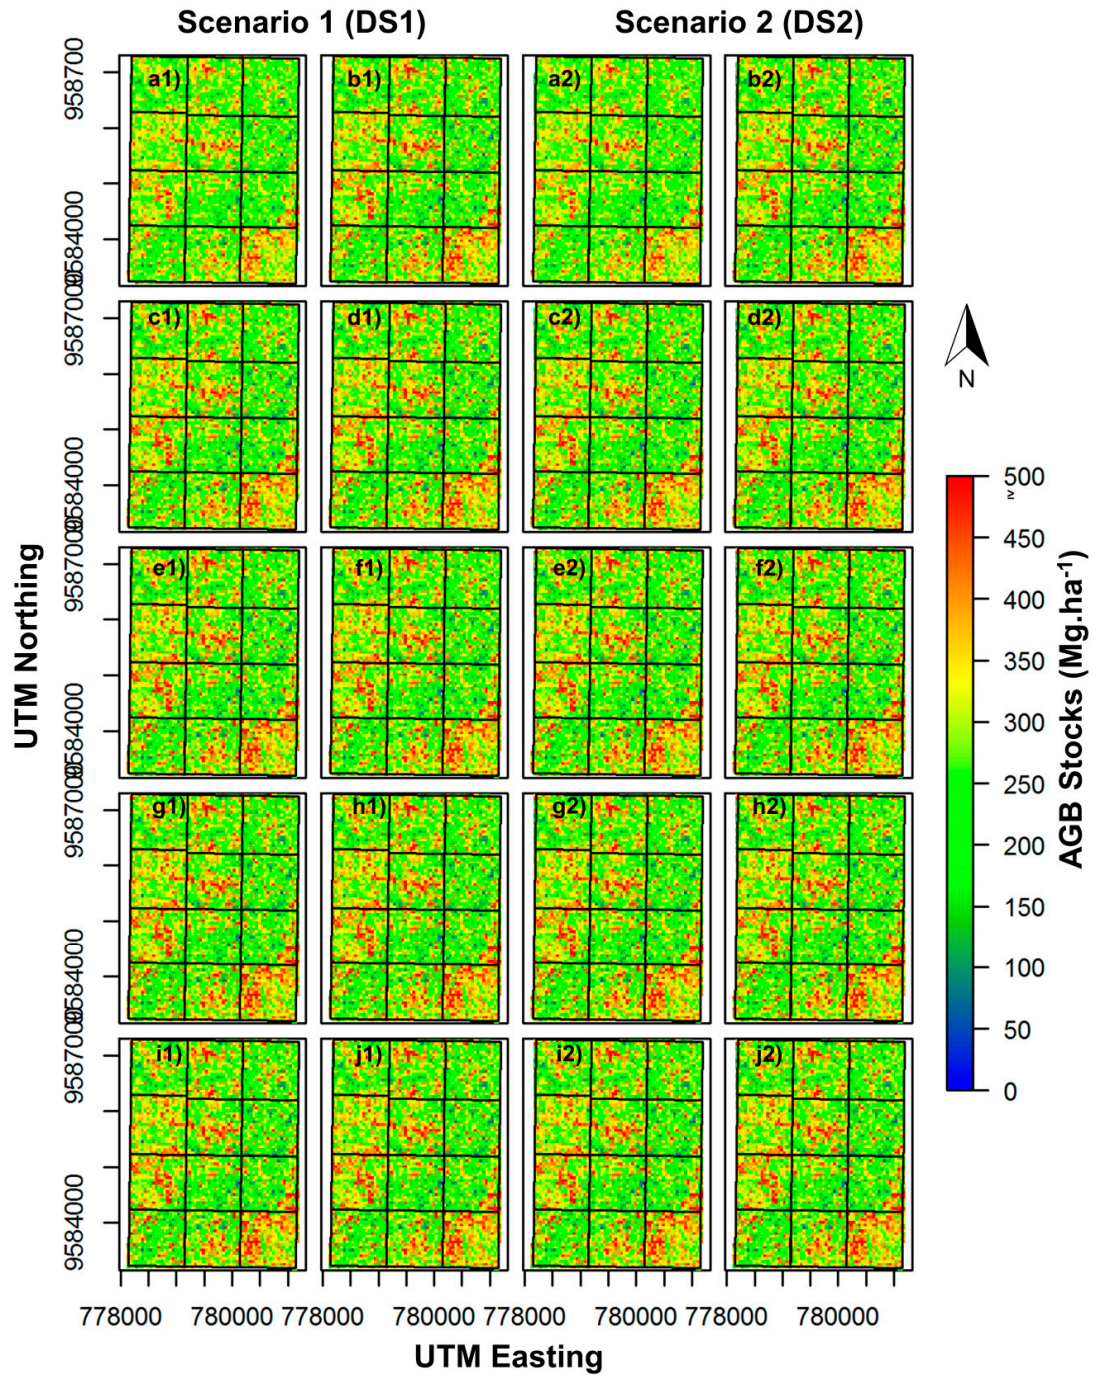

**Figure S2.** Mean of the 30 replicates AGB stocks in 2014 at pulse density ranging from 0.2 to 12 pulse·m<sup>-2</sup> in DS1 (a1–j1) and DS2 (a2–j2).



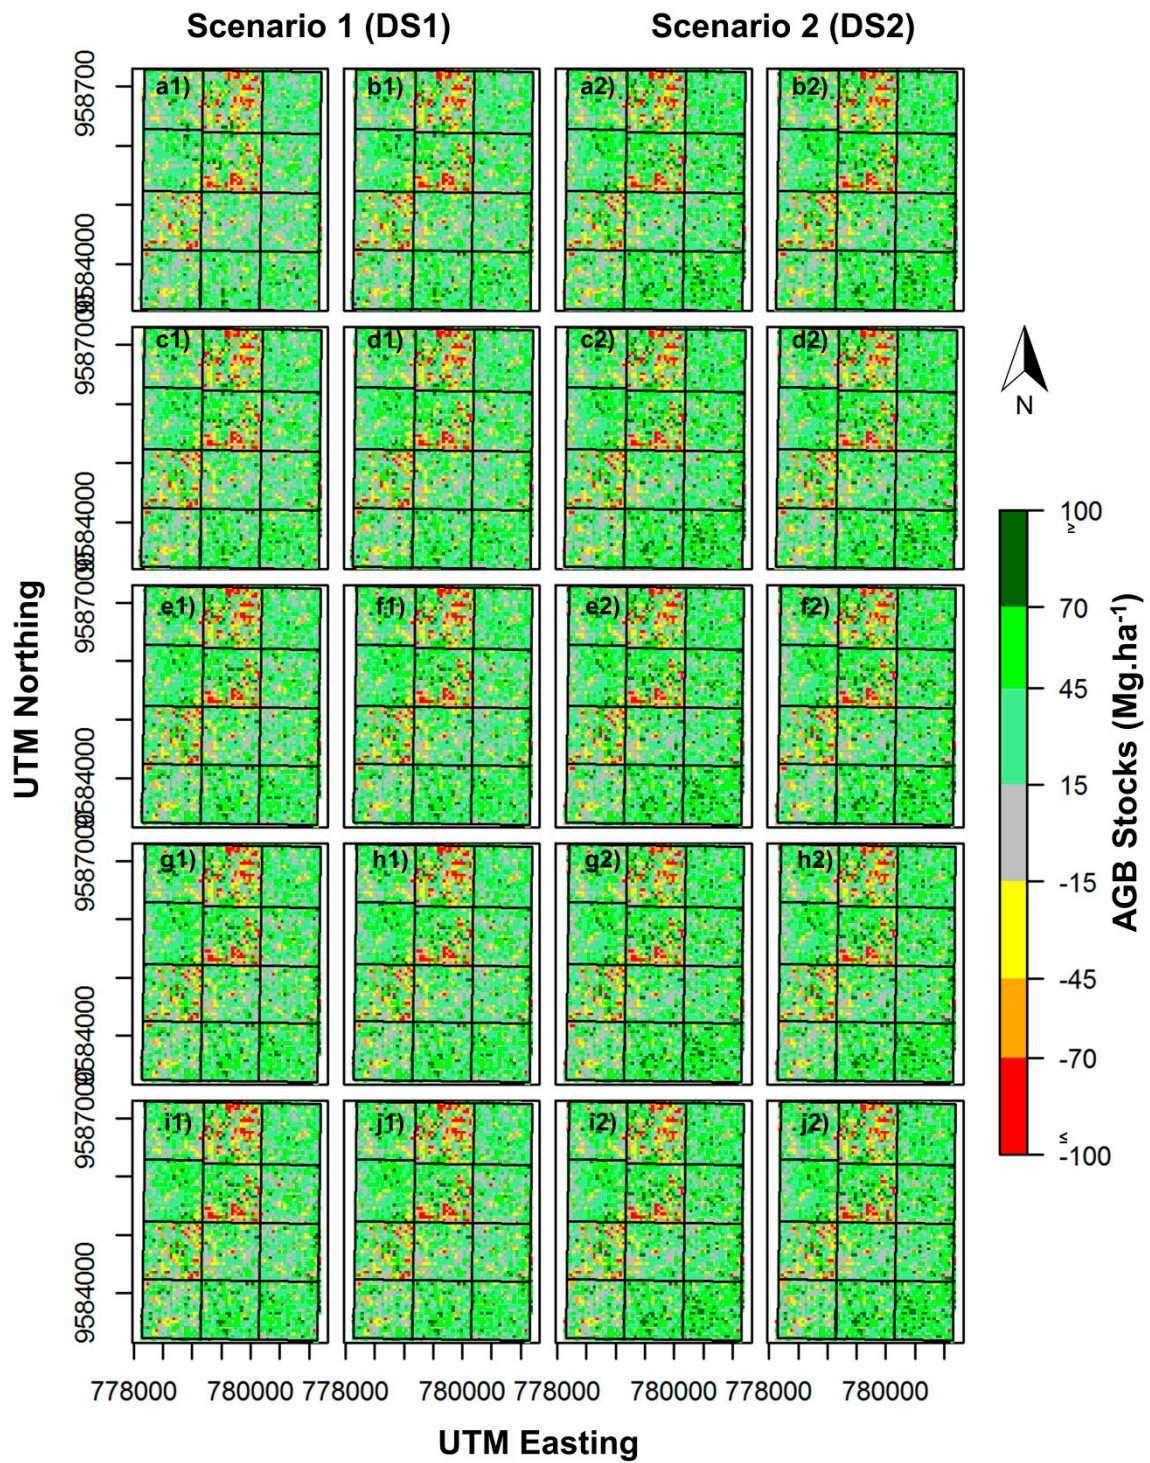

**Figure S3.** Mean of the 30 replicates of AGB change at pulse density ranging from 0.2 to 12 pulse·m<sup>-2</sup> in DS1 (a1-j1) and DS2 (a2-j2).

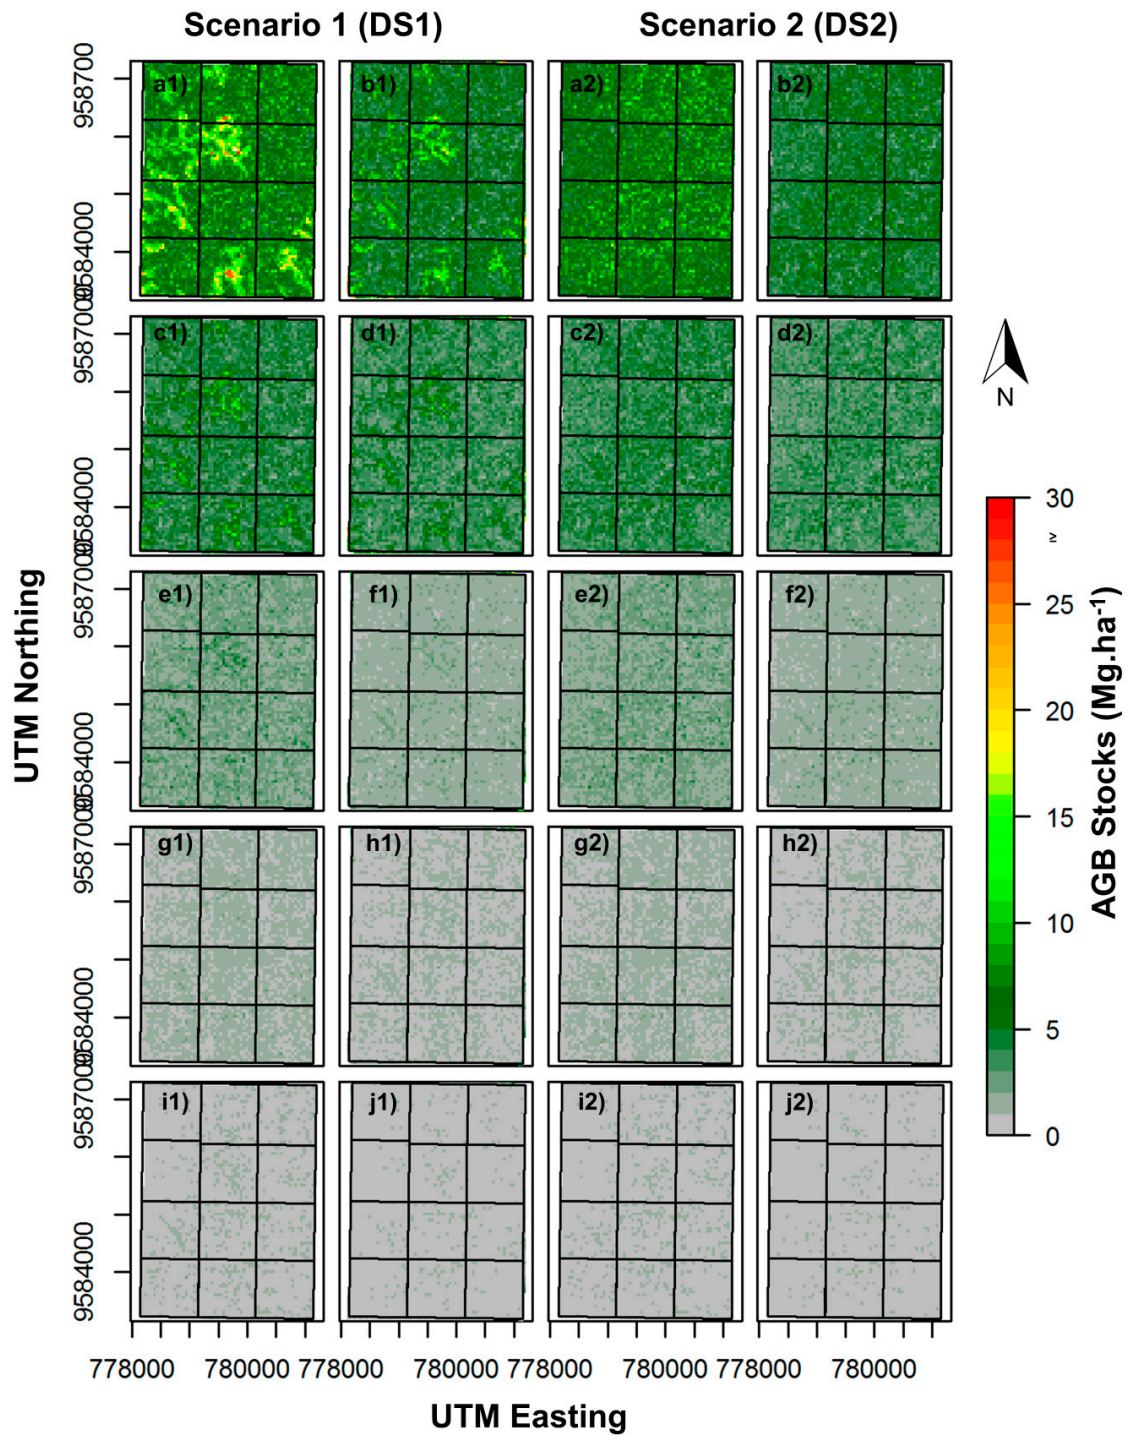

**Figure S4.** Standard deviation of the 30 replicates of AGB change at pulse density ranging from 0.2 to 12 pulse·m<sup>-2</sup> in DS1 (a1–j1) and DS2 (a2–j2).
